Evaluation of endothelial nitric oxide synthase  
gene expression in mice genetically  
heterozygous in Cx43 (Cx43 + / - mice)

Abbreviated Title: Evaluation of eNOS gene expression in Cx43 +/- mice

Obaaloghi WILFRED

[o.wilfred@hotmail.com](mailto:o.wilfred@hotmail.com)

[happywilfred@rocketmail.com](mailto:happywilfred@rocketmail.com)

Department of Life Sciences,  
Glasgow Caledonian University

Statement on conflict of interest: None

Word count: 7,803

Number of tables: 2

Number of figures: 3

## ABSTRACT

Gap junctions are proteins made of connexins which are involved in the regulation of vascular function. Deletion of connexins 43 (Cx43) modifies expression of genes known to be involved in the regulation of the vasculature, differentiation and function of vascular cells. Interestingly, mutant mice lacking endothelial nitric oxide synthase (eNOS) gene have been shown to be hypertensive, suggesting that nitric oxide (NO) plays a role in the physiological control of blood pressure. It was therefore hypothesised that the endothelial deletion of Cx43 in the pulmonary vasculature induces endothelial dysfunction and causes eNOS impairment thereby reducing NO biosynthesis, thus leading to vasoconstriction and vascular remodelling which subsequently leads to the development of pulmonary arterial hypertension (PAH). This project was aimed at evaluating eNOS gene expression in mice genetically heterozygous (HET) in Cx43 (Cx43 +/- mice). This was achieved by using lung tissues from four groups of wild type (W/T) and Cx43 +/- (male and female) mice. Ribonucleic acid (RNA) was isolated from the lung tissues using RNA II isolation system and was reverse transcribed to complementary deoxyribonucleic acid (cDNA). End – point polymerase chain reaction (PCR) and real time PCR were used to measure the expression of eNOS gene. eNOS gene expression levels were found to be the same in all four groups of mice tested, with no significant difference. The result therefore suggests that eNOS gene is expressed in mice genetically heterozygous in Cx43 (Cx43 + / -).

**Key words:** Connexin, eNOS, PCR, Reverse transcription

## INTRODUCTION

Pulmonary arterial hypertension (PAH) is a fatal progressive disease characterized by persistently elevated pulmonary arterial pressure (PAP), thereby leading to failure of the right ventricle [1]. The disease, in which its aetiology is unknown, is associated with low level of pulmonary NO [2] with clinical manifestations including ventilation–perfusion mismatching, shortness of breath, exercise intolerance, fainting and heart failure in severe cases [3, 4]. From the heart, the pulmonary arteries supply deoxygenated blood to the lungs where gas exchange takes place within the pulmonary capillaries [5]. PAH is a multifactorial disease characterized by constriction and remodelling of the pulmonary vasculature, which is the basis for the persistently high pulmonary pressures [6]. The process of vascular remodelling gives rise to increased and disorganised proliferation of smooth muscle cells (SMCs), pulmonary endothelial cells and fibroblasts, thus resulting in reduction in the number of distal arterial vessels as a consequent of increased muscularization of the arteries, which later progresses and leads to vessel occlusion and then finally, formation of plexiform lesion. Due to increased proliferation, the vessel lumen decreases thereby increasing pulmonary vascular resistance (PVR) and PAP, with a reduction in vascular compliance (pressure = resistance x cardiac output) [7].

Recent data reveal that in PAH patients, the mean resting pulmonary artery pressure rises above 25 mmHg [6] and tends to increase further to 30 mmHg during exercise [8]. Elevated arterial blood pressure is a key risk factor leading to cardiovascular diseases such as right heart failure which is the main cause of mortality In PAH patients [9, 10]. There is poor prognosis and rate of survival from the disease has been reported as only 58% after 3 years on therapy [11]. The disease which occurs more frequently in women than in men presents a remodelled and obliterated pulmonary vasculature, advancing to right ventricular (RV) dysfunction and death [10, 12].

The exact pathogenesis of PAH is not completely understood, however, serotonin, bone morphogenetic protein receptor type 2 and NO pathways have been shown to play major roles in the development of the disease [13, 14]. There is need for novel drugs therapies targeting both vasoconstriction and remodelling, which can only be achieved with known pathogenesis [6]. PAH, which represents group one within the pulmonary hypertension WHO clinical classification system can be further classified, based on aetiology, into idiopathic PAH (IPAH), heritable PAH (HPAH), drug and toxin-induced PAH, associated PAH (APAH) and Persistent pulmonary hypertension of the new born (PPHN) [15].

Regulation of vascular tone and blood flow is mediated by NO which is synthesized by eNOS in the endothelial cells of the pulmonary vasculature. When activated, eNOS catalytically reacts L-arginine and oxygen to produce NO which functions via the NO/cGMP pathway to regulate vascular tone by crossing the endothelium to the vascular smooth muscle and activating soluble guanylyl cyclase which produces cyclic guanosine monophosphate (cGMP) which activates protein kinase G (PKG), thereby mediating smooth muscle relaxation [16]. Expectedly, PDE-5 expression was raised in chronic hypoxic rat, which explains some vascular in the pulmonary vessels as PDE -5 degrades cGMP [17]. Recent studies have shown that NO modulates and maintains arterial pressure [18] and serves as a suppressor of SMC proliferation [19]. The NO pathway is tonically active in resistance vessels, reducing the peripheral vascular resistance and therefore blood pressure [20]. Mutant mice lacking eNOS gene have been shown to be hypertensive, supporting a role for physiological control of blood pressure by NO [20] as genetic mutation of eNOS gene results in failure or insufficient synthesis of NO, giving rise to vasoconstriction and thereby resulting to increase in peripheral blood pressure, which could possibly lead to the formation of atheroma [21]. The enzyme arginase regulates NO biosynthesis through its effect on arginine. Consequently, its activity has been shown to be higher in serum of PAH patients than in controls, suggesting that NO is implicated in the pathogenesis of PAH [2]. Arginase II

expression level was increased with a reduction in NO synthesis in pulmonary artery endothelial cells extracted from PAH lungs when compared to control cells in vitro [2].

Cell – cell communication via gap junctions is essential in controlling normal vascular function [22, 23]. These cellular communications involve a family of transmembrane proteins called connexins which oligomerize into a hemichannel and eventually pair with a partner hemichannel in an adjacent cell forming gap junctions that allow cell-to-cell coupling between endothelial and SMC [6, 24]. Key connexin family members involved in the vasculature include connexin 37 (Cx37), connexin 40 (Cx40), connexin 43 (Cx43) and connexin 45 (Cx45), and all play significant role in regulation of vascular function such as mediation of vascular tone, vascular growth, angiogenesis, cell development and differentiation [25] and the passage of cGMP and  $Ca^{2+}$ , thus regulating vascular tone [26].

Studies have demonstrated that Cx43 expression is restricted to the endothelial cells at branch parts of pulmonary arteries [27]. Genetic deletion of Cx43 in mice corresponds with significantly elevated smooth muscle proliferation [28]. Studies on Cx43 expression in animal models appear to be inconsistent as different effects of Cx43 deletions have been reported [29]. While increased neointimal and adventitia formation were observed in Cx43 knockout mice [28] a recent study however revealed a reduced neointimal formation in Cx43 heterozygous mice [30]. Deletion of Cx43 has been shown to modify expression of genes known to be involved in differentiation and function of vascular cells and cell signalling pathways important for the regulation of vasculogenesis and angiogenesis [31]. Since mutant mice lacking eNOS gene has been shown to be hypertensive, supporting a role for physiological control of blood pressure by NO [20], there seem to be interplay between Cx43 and eNOS expression [32].

The aim of this project was to evaluate the eNOS gene expression in mice genetically heterozygous in Cx43 (Cx43 +/- mice). Lung tissues from four groups of wild type and Cx43 +/- (male and female) mice were used. RNA was isolated from the lung tissues using RNA II isolation system and was reverse transcribed to cDNA. To measure the expression of eNOS gene, end – point PCR and real time PCR were used.

## **MATERIALS AND METHODS**

### ***Animal model and Tissue preparation***

The investigation conforms to the United Kingdom Animal procedures act 1986, and with the Guide for the Care and Use of Laboratory Animals published by the US National Institutes of Health (NIH publication, 8<sup>th</sup> Edition, 2011). Ethical approval was granted by the University Ethics Committee. Male and female wild type and connexin 43 heterozygous mice were maintained in group cages, on saw dust bedding, and subjected to a 12 h–12 h light–dark cycle with food and water provided *ad libitum*. In this study, a total of 12 wild type mice and 12 connexin 43 heterozygous mice aged between 20 and 28 weeks were used. Animals were culled using intraperitoneal administration of pentobarbital sodium (60mg/kg i.p.; JM Loveridge plc, Southampton, UK), lung tissues snap frozen and stored at -80°C until further use. The tissue samples were labelled as shown in table 1.

### ***Extraction of RNA using Nucleospin RNA II isolation system***

Total RNA was isolated from the mice lung tissues using NucleoSpin® RNA II kit supplied by Macherey-Nagel GmbH & Co. KG, Germany. In proceeding with the RNA extraction from the lung tissues, first, 70% ethanol was prepared from 100% ethanol stock solution. Using the mathematical equation  $M_1V_1 = M_2V_2$ , the volume of water added to ethanol to make it 70% concentrated was obtained by cross multiplying the equation.  $V_1 =$  volume of stock solution needed =  $M_2V_2 / M_1 = (70 \times 100) / 100 = 70\text{ml}$ . Therefore, 70ml stock ethanol was diluted with 30ml of water, concentrating it to 70%. Furthermore, a DNase reaction mix was prepared in an Eppendorf tube by adding 10  $\mu\text{l}$  of reconstituted rDNase to 90  $\mu\text{l}$  Reaction buffer for rDNase, enough for all the samples. The reaction mix was briefly vortexed and stored on ice, and when required, 95 $\mu\text{l}$  from it was added to each of the RNA samples. Each of the dissected (~10 mg) tissue was placed into lysis tubes containing 3 metal beads, 320 $\mu\text{l}$  lysis buffer RA1 and 3.5 $\mu\text{l}$  TCEP. Using Fast prep -24 homogenizer (MP Biomedicals United



Kingdom), tissues were disrupted and homogenized as they were lysed 3 times at speed 5 for 20 seconds. Each time the tissues were lysed, the lysis tubes were removed and placed on ice for 1 minute so as to prevent overheating. The lysate was added to Nucleospin filter unit, which was then placed in a 2ml collection tube. RNA was extracted from the lysate after centrifugation at 13,000 rpm for 1 minute. RNA binding condition was adjusted by adding 320µl of 70% ethanol to each homogenised lysate in the collection tubes after removing the filter units. The content of the collection tubes were properly mixed by pipetting up and down for 5 times, using a pipette man. This was then transferred to a NucleoSpin RNA column in a 2ml collection tube alongside precipitate which had formed. The samples were centrifuged for 30 seconds at 10,00rpm and the flow-through discarded. 350 µl of membrane desalting buffer (MDB) was added to the NucleoSpin RNA column and centrifuged at 13,000rpm for 1 minute and then the flow-through was discarded. To digest the DNA, 95µl from the DNase reaction mixture was added directly onto the centre of silica membrane of each of the columns and was then incubated at room temperature for 15 minutes. The silica membrane was washed and dried by first adding 200µl RA2 to each of the spin columns and centrifuging them for 30 seconds at 10,000rpm. This was shortly followed by placing the columns in fresh collecting tubes. Furthermore, 600µl buffer RA3 was added to the columns in the fresh tubes and then centrifuged for 30 seconds at 10,000rpm. The flow-through was discarded and the columns dried completely by further adding 250µl of RA3 buffer and centrifuging it for 2 minutes at 13,000rpm. Buffers RA2 and RA3 are wash buffers. While RA2 was used to inactivate the rDNase, the more concentrated RA3 was used to efficiently wash the inner rim and dry the membrane completely (Macherey-Nagel, 2015). The columns from the collection tubes were removed and transferred to a 1.5ml Eppendorf tube and 60µl RNase free water was added directly onto the column membrane. The membranes were completely covered and then centrifuged at 13,000rpm for a minute. The columns were discarded and the tube containing the eluted RNA samples kept on ice before being stored at -20 °C till the next day.

To avoid contamination and degradation of the RNA, proper care was ensuring gloves were worn and frequently changed when handling RNA samples. Also, reactions were always prepared and kept on ice, thereby preventing RNA degradation.

### ***RNA quantification***

Quantification of the RNA samples was done by using NanoDrop® ND-1000 UV/V Spectrophotometer software (Thermo Fisher Scientific Inc., Waltham, MA, USA) and then calculating the volume of tissue necessary for reverse transcription. The fibre optic measurement surface of the Nano drop device was first cleansed with alcohol to avoid contamination. This was followed by blanking with 1µl RNase free water directly dropped onto the optic measurement surface. This was followed by clicking the blank and ensuring the wavelength was set to zero, which was the absorbance background against which the samples were measured. Each sample was measured in duplicate and the readings presented in table 2. To know how much of each sample would be used, calculation was made based on the sample with the lowest concentration (85ng/µl) and the required volume of water was added to normalize the tissues (table 2).

### ***Primer Design – Reverse transcription (RT)***

The precision nanoScript 2 RT kit used was supplied by Primerdesign Ltd., Southampton, UK. Frozen reagents were thawed and briefly centrifuged while the rest reagents were placed on ice. 9µl of (85 ng/µl) RNA samples, 0.5 µl Random hexamers and 0.5µl Oligo dTs was added to a thin 0.2ml PCR tube, making up to 10µl. A lid was applied to each sample and was placed in the PCR machine (Biometra GmbH, Göttingen, Germany) and programmed to heat the samples to 65°C for 5 minutes, which was the annealing temperature (used as per manufacturer's protocol). After 5 minutes, the samples were

retrieved and immediately placed on ice for cooling. An RT master mix was made in a thin walled 0.2 ml PCR tube. For every RT reaction, 10 $\mu$ l of the master mix was added to each sample on ice. The samples were covered with lids and vortexed briefly following a pulse spin and incubated as follows on the PCR machine: 25°C for 5 minutes, 42°C for 20 minutes (extension step), and 72°C for 15 minutes (inactivation step). After the PCR has completed the RT process, the cDNA samples were removed from the machine and stored at -20°C till further use.

#### *Dilution of cDNA*

When required, 3 $\mu$ l each of stored cDNA was transferred into fresh PCR tubes. cDNA was diluted with 27 $\mu$ l RNase free water, making it up to 30 $\mu$ l. From the 30 $\mu$ l diluted cDNA, 5 $\mu$ l was transferred to a 0.2ml fresh PCR tube. The diluted cDNA was then stored at -20°C for later use.

#### ***Reverse transcription – Polymerase Chain Reaction (end point PCR)***

The primers used to amplify the cDNA and their expected product lengths were supplied by Applied Biosystems™ (Roche molecular systems, Inc., Branchburg, USA) and were given as follows: eNOS forward primer: 5'TGGAGAGAGCTTTGCAGCAG'3 and the reverse primer: 5'GATATCTCGGGCAGCAGCTT'3 (424 bp);  $\beta$ -actin forward primer: 5'CCCTGAACCCTAAGGCCA'3 and the reverse primer: 5'AGGATTCCATACCCAAGAAGGAA'3 (489 bp) (figure 2). The eNOS primers were delivered in powdered form as 25 nmoles and were therefore reconstituted with 1000 $\mu$ l RNase free water to result in final concentration of 25pmol/ $\mu$ l.

A master mix for all 24 samples containing 25 $\mu$ l Reddy mix, 0.3  $\mu$ l of forward eNOS primer and 0.3 $\mu$ l of reverse primer was made. The master mix was mixed by vortexing, and 26  $\mu$ l from it was added to the 5  $\mu$ l cDNA in the PCR tube. The reagents were mixed and briefly

centrifuged to ensure contents were at the bottom of the tube. A PCR negative control was made with 26 $\mu$ l from the master mix and 5 $\mu$ l RNAse free water instead of cDNA template, ensuring that the primers and the ReddyMix were free of DNA contamination. The tubes were transferred to the PCR machine and were programmed at 95°C for 2 minutes (initial denaturation step), 34 x (94°C for 30 seconds (denaturation) /55°C for 60 seconds (annealing step) /72°C for 60 seconds (extension step)) and 72°C for 10 minutes (final extension). The RT-PCR was also carried out for the housekeeper gene,  $\beta$ -Actin with 0.6 $\mu$ l  $\beta$ -Actin added to each cDNA sample. At the end of the PCR, the cDNA samples were retrieved and stored at -20°C.

### ***Gel electrophoresis***

The specificity of the amplified gene and hyperladder was checked with gel electrophoresis analysis on a 1% agarose gel containing 4 $\mu$ l midori green (Nippon Genetics Europe GmbH, Düren, Germany) and 0.5X TBE (tris / borate / EDTA) solution made from 5X TBE solution following dilution. The 5X TBE was composed of 27g of Tris base powder, 13.5g of powdered boric acid and 1.6ml liquid Ethylenediaminetetraacetic acid (EDTA), all purchased from Fisher Scientific UK Ltd., Loughborough, UK. 10 $\mu$ l of 100bp hyperladder (NorgenBiotek Corp., Thorold, ON, Canada), 20 $\mu$ l of negative control and 20 $\mu$ l each of all cDNA samples incubated with eNOS gene were loaded onto the gel tank and was electrophoresed for 45 minutes at 120 Volts. Electrophoresis was again carried out for  $\beta$ -actin using the process detailed above but with 5 $\mu$ l of 100bp hyperladder IV (Biolone Reagents Limited, London, UK) as it was the only available hyperladder. The gel was photographed using Molecular Imager® Gel Doc™ XR+ System with Image Lab™ Software (Bio- Rad Laboratories Ltd, UK) and the results shown in figure 1.

### ***Quantitative Real - Time Polymerase Chain Reaction (qRT-PCR)***

The primers used, as well as the 2x qPCR master mix kit were purchased from Primerdesign Ltd., Southampton, UK. First, into fresh PCR tubes on ice, 2 $\mu$ l each of stored cDNA was diluted with 18 $\mu$ l RNase free water, from which 1.5 $\mu$ l was transferred to a 96 well plate in triplicate for Real-time PCR (figure 2). A PCR negative control without cDNA was also made in triplicate with 1.5 $\mu$ l RNase free water. A master mix containing 5 $\mu$ l 2x master mix, 0.5  $\mu$ l eNOS primer and 3 $\mu$ l water was made, sufficient for only 21 samples. The master mix was vortexed and 8.5  $\mu$ l from it was added to each of the 96 well plate containing the 1.5  $\mu$ l cDNA. The plate was covered with a film and briefly centrifuged using Allegra X-22R Centrifuge (Beckman Coulter Ltd., High Wycombe, UK) to ensure contents were at the bottom of the plate. The plate was thereafter placed in the ViiA™ 7 Real-Time PCR System (Life Technologies Ltd, Paisley, UK) and was programmed to cycle at 50 °C for 2 minutes, 95 °C for 10 minutes and 40 x ( 95 °C for 15 seconds/ 60 °C for 1 minute). The 50 degrees step was required to activate the uracil N-glycosylase (UNG) and to remove any contamination. The 95 degree step for 10 minutes was the Taq activating step, at same time denaturing the UNG. At 95 °C for 15 seconds, the dsDNA template denatured. The annealing and extension of the primers by the Taq occurred at 60 °C for 1 minute [33]. Real-time PCR was also done using the housekeeper, ubiquitin C (UBC) primer. The different templates of the gene served as coding and non-coding strands, with only the non - coding strand being transcribed during PCR as it contains the anti-codons [34]. The 2 x qPCR master-mix used was labelled with ROX™ fluorescent dye. The qPCR links the amplification of DNA to the generation of fluorescence of ROX dye and was detected during each PCR cycle in real time. The higher the amplified DNA, the higher the intensity of the fluorescence [35]. At the end of the qPCR, the data was first analysed on Microsoft office Excel 2010 (Microsoft Corporation, Redmond, USA). The quantitation cycle (CT) values for all the samples were obtained. The delta delta ( $\Delta\Delta$ ) CT method was applied in calculating the change in gene expression. For example, for HET male 1, the average eNOS CT value for

the triplicate was 27.665. Average UBC CT value was 24.308. Therefore,  $\Delta$ CT value for HET male 1: GOI (HET male1) – HK (HET male 1) = 27.665 – 24.308 = 3.357. With the Excel, the average  $\Delta$ CT values for all HET male were obtained and used in calculating the  $\Delta\Delta$ CT values for all other groups. Using GraphPad Prism™ (GraphPad Software Inc., La Jolla, USA), data was collated and relative eNOS gene expression presented on a bar chart while statistical analysis was done using two-way ANOVA (figure 3).

### ***Statistical analysis***

Results are expressed as mean  $\pm$  standard error of mean (SEM), and n shows the number of mice used for end point PCR and qPCR. For end point PCR, gene expressions were visually analysed by looking at the bands and comparing them with the 100bp hyperladder. For qPCR, eNOS gene expression was analysed using two - way ANOVA followed by multiple comparison tests to compare the gene expression levels in both genotypes and phenotypes. A value for  $p < 0.05$  was considered to be significant.

## RESULTS

### ***End point PCR***

To investigate the gene expression of eNOS in heterozygous Cx 43 mice, end point PCR was used to measure the eNOS gene. PCR analysis was done with eNOS and  $\beta$ -Actin transcripts. PCR analysis of eNOS showed that the only visible eNOS bands were in W/T male and HET female and had band size of 200bp. This was however different from the expected size of 424 bp when compared with the hyper ladder (figure 1A). Though,  $\beta$ -Actin was expressed in most of the samples, W/T female was not visible. The size of  $\beta$ -Actin detected was 600bp which was also different from the expected size of 489bp (figure 1B). There were no bands detected in the negative controls.

### ***qRT - PCR***

For more efficiency and reliability, qRT – PCR was used to check the specificity of amplified gene product. eNOS gene was detected in lung tissues relative to UBC (figure 3). Using two - way ANOVA, it was observed that there was no significant difference in the gene expression of eNOS in all four groups of mice models: HET male ( $1.0 \pm 0.19$ , n = 5), W/T male ( $0.86 \pm 0.35$ , n = 6), HET female ( $1.04 \pm 0.14$ , n = 5) and W/T female ( $0.82 \pm 0.16$ , n = 5). Both HET (Cx43) male and HET (Cx43) female mice showed approximately equal eNOS gene expression levels when compared with their W/T counterparts. There was no change in levels of expression of eNOS in W/T male and W/T female. When statistical analysis was performed at 95% confidence interval, there was no significant difference in eNOS gene expression in both genders ( $P = 0.98$ ) and genotype ( $P = 0.43$ ).

| <b>HET (Cx 43 +/-)<br/>male</b> | <b>W/T male</b> | <b>HET (Cx 43 +/-)<br/>female</b> | <b>W/T female</b> |
|---------------------------------|-----------------|-----------------------------------|-------------------|
| 1                               | 1               | 1                                 | 1                 |
| 2                               | 2               | 2                                 | 2                 |
| 3                               | 3               | 3                                 | 3                 |
| 4                               | 4               | 4                                 | 4                 |
| 5                               | 5               | 5                                 | 5                 |
| 6                               | 6               | 6                                 | 6                 |

**Table 1** Labelled lung tissue samples extracted from the 24 mice



| RNA sample        | Concentration (ng/μl) | DNA/RNA (260/280) | Volume of RNA (μl) | Volume of water (μl) | Total volume (μl) |
|-------------------|-----------------------|-------------------|--------------------|----------------------|-------------------|
| <b>HET Male</b>   |                       |                   |                    |                      |                   |
| 1                 | 110                   | 2.11              | 10                 | 2.9                  | 12.9              |
| 2                 | 85                    | 2.14              | 10                 | 0                    | 10.0              |
| 3                 | 185                   | 2.13              | 10                 | 11.7                 | 21.7              |
| 4                 | 235                   | 2.12              | 10                 | 17.6                 | 27.6              |
| 5                 | 195                   | 2.13              | 10                 | 12.9                 | 22.9              |
| 6                 | 195                   | 2.15              | 10                 | 12.9                 | 22.9              |
| <b>W/T Male</b>   |                       |                   |                    |                      |                   |
| 1                 | 275                   | 2.18              | 10                 | 22.35                | 32.35             |
| 2                 | 130                   | 2.10              | 10                 | 5.29                 | 15.29             |
| 3                 | 260                   | 2.12              | 10                 | 20.58                | 30.58             |
| 4                 | 185                   | 2.17              | 10                 | 11.76                | 21.76             |
| 5                 | 135                   | 2.09              | 10                 | 5.88                 | 15.88             |
| 6                 | 205                   | 2.09              | 10                 | 14.11                | 24.11             |
| <b>HET Female</b> |                       |                   |                    |                      |                   |
| 1                 | 300                   | 2.10              | 10                 | 25.29                | 35.29             |
| 2                 | 85                    | 2.06              | 10                 | 0                    | 10                |
| 3                 | 320                   | 2.10              | 10                 | 27.64                | 37.64             |
| 4                 | 525                   | 2.13              | 10                 | 51.76                | 61.76             |
| 5                 | 490                   | 2.12              | 10                 | 47.64                | 57.64             |
| 6                 | 245                   | 2.10              | 10                 | 18.82                | 28.82             |
| <b>W/T Female</b> |                       |                   |                    |                      |                   |
| 1                 | 180                   | 1.89              | 10                 | 11.17                | 21.17             |
| 2                 | 115                   | 2.13              | 10                 | 3.52                 | 13.52             |
| 3                 | 205                   | 2.10              | 10                 | 14.11                | 24.11             |
| 4                 | 245                   | 2.10              | 10                 | 18.82                | 28.82             |
| 5                 | 470                   | 2.21              | 10                 | 45.29                | 55.29             |
| 6                 | 385                   | 2.13              | 10                 | 35.29                | 45.29             |

**Table 2** Quantified RNA samples obtained after nanodrop and the volume of water added to each sample to normalise it to 85ng/μl. The concentrations and DNA/RNA ratio are in duplicate values.

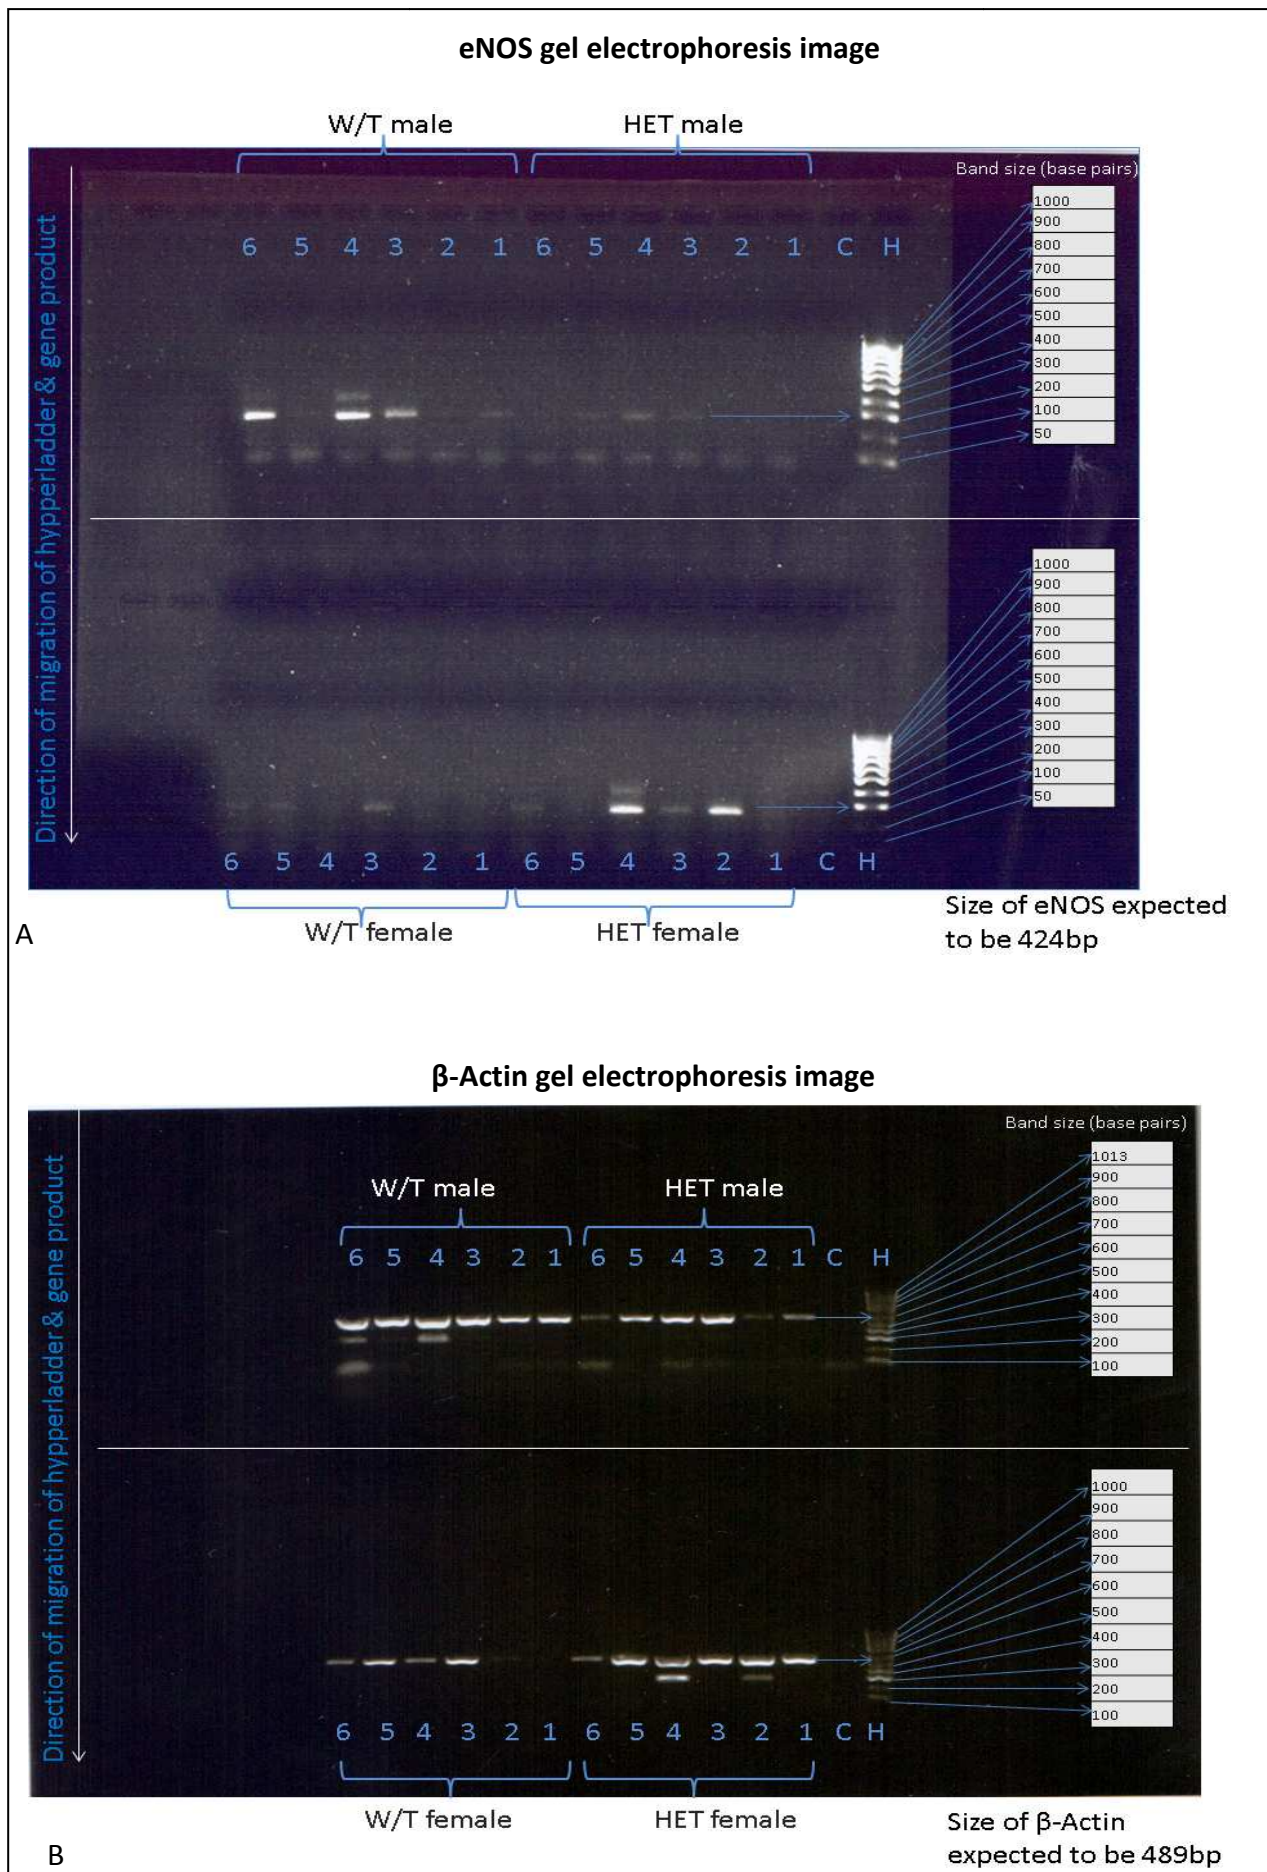

**Figure 1 Gel electrophoresis image** Showing expression of eNOS gene (A) and  $\beta$ -Actin (B), control (C), with reference to 100bp hyperladder (H). The numbers represent each sample in a well, corresponding to cDNA from HET male (n = 6), W/T male (n = 6), HET female (n = 6) and W/T female (n = 6). Downward arrows indicate direction of migration of the samples. The expected gene size is also indicated.

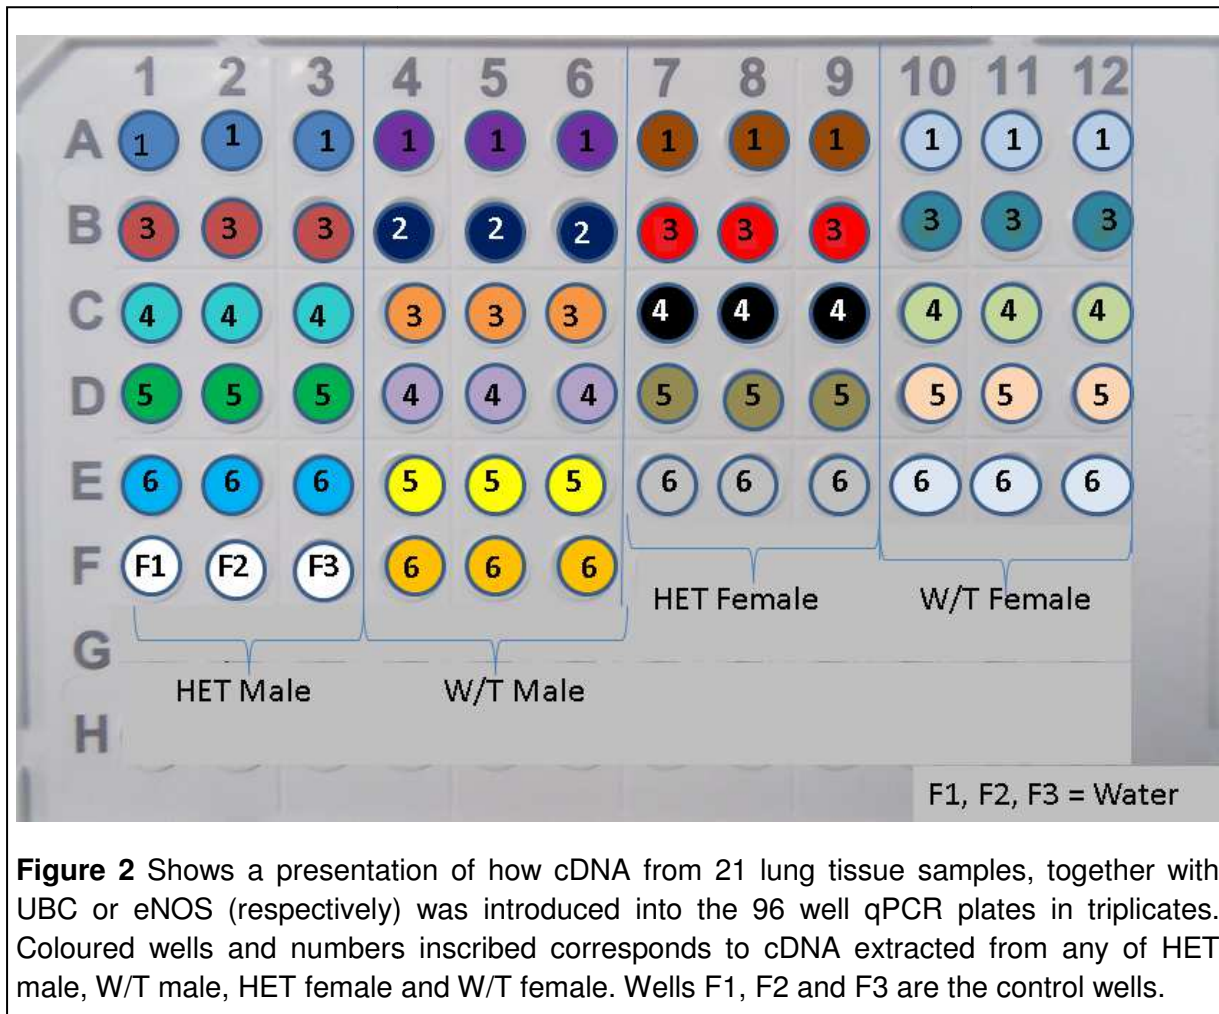

### Graph of eNOS gene expression relative to UBC in both wild type and heterozygous male and female mice

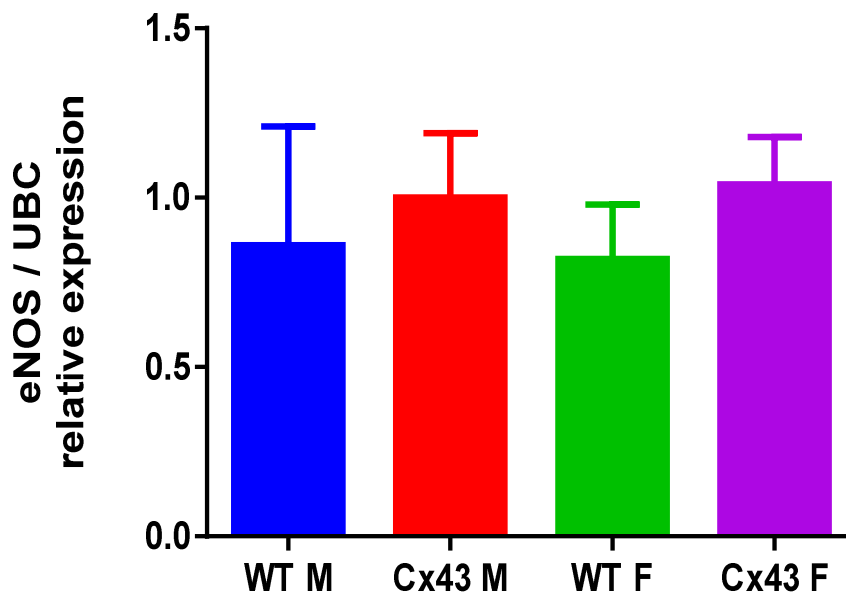

**Figure 3 Expression of eNOS.** Shows mean values  $\pm$  SEM of relative gene expression levels measured by qRT – PCR in lung tissues from W/T male (n =6, blue column), HET male (Cx43 M),n = 5, red), W/T female (n = 5, green) and HET female (Cx43 F, n = 5, pink).

## DISCUSSION

The present study tested the expression of eNOS gene in genetically heterozygous Cx 43 (Cx 43 +/-) mice conducted in four groups of mice: W/T male, Cx43 +/- male, W/T female and Cx43 +/- female. The investigation for eNOS expression from the mice lung tissues was first carried out using RT – PCR. Since the bands do not correspond to the expected size of eNOS gene (434bp), it was suggested that the eNOS primers did not pick up the eNOS gene from the cDNA. Also, the negative control wells did not show any bands as they did not contain any cDNA. The housekeeping genes are essential in cellular maintenance in humans and animals and are thought to maintain constant expression levels in all cells, and so, are used as normalizing standards in gene expression [36].  $\beta$ -Actin was expressed in most of the samples, however, the few samples which appeared not visible suggests insufficient cDNA or contamination. The discrepancy in the size of  $\beta$ -Actin could be also bedue to primers not picking the gene. The use of agarose gel electrophoresis in measuring gene expression of eNOS was quick and easy to cast, it was however unsuitable in separating low molecular weight samples [37], hence the need for qRT – PCR. UBC was shown to be present in the target DNA under test and was used to confirm that the qRT-PCR process worked properly. Since there was no change in the gene expression levels of eNOS, it was therefore suggested that eNOS expression (and possibly its signalling pathway) is not impaired in mice heterozygous in Cx43 (Cx43 +/- mice). Also, gender does not affect eNOS expression as there was no observed change in its expression in both genders. This observation was however not consistent with a recent study by [38] in which sex-dependent alterations of eNOS protein expression in cardiac tissues of male and female W/T mice with heart failure was investigated. Female W/T mice eNOS protein expression levels and activation was shown to be higher than W/T males, and the difference could be due to the presence of eNOS dephosphorylating calcineurin- A found in W/T males [38].

Recent studies have shown Cx43 to be essential in coordinating cell proliferation and migration in vascular walls [39]. This was confirmed in smooth muscle cells of Cx43 gene knockout mice in which manifestation of accelerated growth of the neointima and the adventitia was observed [28]. Diabetes – impelled inhibition of Cx 43 expression adds to vascular cell apoptosis in retinal endothelial cells of diabetic mice [40]. Quantitative evaluation of Cx 43 expression was shown to be significantly reduced in borderline hypertensive rats (P <0.05) and spontaneously hypertensive rats (P <0.05) compared to normotensive controls [41]. The reduced Cx 43 expression was shown to contribute to remodelling of vascular cell wall and also affect gap junction communication, which was more pronounced in fully established hypertensive rats [41]. This suggests that the accelerated growth of the SMC correlates with Cx43 deletion. However, another finding revealed reduced neointimal formation in Cx 43 heterozygous mice [30]. Interestingly, deletion of Cx43 in mice endothelial cells resulted in hypotension [42] as Cx43 expression was shown to be upregulated in pulmonary arteries from chronically hypoxic rats [24]. However, a decrease in the expression of Cx43 was observed in rats' aorta when nitric oxide synthase was inhibited [43]. Mice with endothelial cell (EC) specific deletion of Cx43 showed severely reduced Ca<sup>2+</sup> communication between the EC [44]. Since NO biosynthesis in the EC depends on activation by Ca<sup>2+</sup> - calmodulin complex, and since there has been evidence that mutant mice which lack eNOS gene appears to be hypertensive [20], a link between Cx43 and eNOS expression has been established, though, with yet to be defined pathway [45]. Since vascular connexins do not operate in isolation, modifying the expression of one connexin may affect the expression of the other [46, 42], and could also influence eNOS gene expression.

Given the different effects of Cx43 deletions in animal models, and the expression of eNOS gene in the mice tested, future work is therefore recommended in understanding the pathogenic basis of PAH. Reactive oxygen species, as well as the interaction of caveolin -1 and other Cx with eNOS affects eNOS activity [47], and this should be taken into account

when investigating eNOS expression within a larger population of mice models. How these interactions contribute to rise in PAP could then be measured by taking hemodynamic measurements of lung tissues from the mice under investigation.

## CONCLUSION

In conclusion, the findings have demonstrated that eNOS gene is expressed in both W/T mice and mice heterozygous in Cx43 (Cx43 + / - mice). The expression level of eNOS gene has been shown not to be influenced by gender, and that Cx43 is involved in the development of PAH. Even though eNOS mutant mice seem to develop hypertension, the interaction of Cx43 and eNOS signalling pathway in the pulmonary vasculature appears to be a complex one. Based on these evidences, there are many routes for further research into the interaction of eNOS and other connexins, and how these interactions could affect the expression of eNOS which could possibly lead to the development of PAH.



## ACKNOWLEDGEMENT

Firstly I would like to thank my supervisor, Dr Yvonne Dempsie for supervising this project and giving me the opportunity to carry out this research.

Particular thanks to my extended family and siblings, especially Comr. (Sir) Messiah Wilfred and HM (King) & Mrs T. M. Jamala II for their incredible support and words of wisdom.

Let me acknowledge my ever striving parents, Chief & Mrs Wilfred Uriah. I dedicate this research project to you. I could not have got through this challenging time without your support and guidance.

Finally, I give God the glory for his protection, mercies and faithfulness throughout my stay in the United Kingdom.

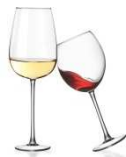

Cheers everyone when I get a proper job!

*O. Wilfred*

## REFERENCES

### *Articles in journals*

1. Chin KM, Rubin LJ. Pulmonary Arterial Hypertension. J American College of Cardiol 2008; **51**(16): 1527-1538
2. Xu W, Kaneko FT, Zheng S, Comhair SA, Janocha AJ, Goggans T, Thunnissen FM, Farver C, Hazen SL, Jennings C, Dweik RA, Arroliga AC, Erzurum SC. Increased arginase II and decreased NO synthesis in endothelial cells of patients with 7 pulmonary arterial hypertension. J Federation of American Societies for Experimental Biology 2004; **18** (14): 1746
3. Chin KM, Kim NHS, Rubin LJ. The right ventricle in pulmonary hypertension. Coron. Artery Dis 2005; **16**: 13–18
4. Hemnes AR, Champion HC. Right heart function and haemodynamics in pulmonary hypertension. Intl J clinical practice 2008; 62 (160): 11-19

### *Book*

5. Martini HF, Nath LJ, Bartholomew FE. *Fundamentals of Anatomy and Physiology*. San Francisco: Pearson Education; 2012

### *Articles in journals*

6. Dempsie Y, Martin P, Paul DU. Connexin-mediated regulation of the pulmonary vasculature. Biochem Society Transactions 2015; **43** (3): 524
7. Rabinovitch M. Molecular pathogenesis of pulmonary arterial hypertension. J clinical investigation 2008; **118** (7): 2372-2379
8. Badesch DB, Champion HC, Gomez SMA, Hoepfer MM, Loyd JE, Manes A, Mcgoon M, Naeije R, Olschewski H, Oudiz RJ, Torbicki A. Diagnosis and Assessment of Pulmonary Arterial Hypertension. J Amer Coll of Cardiol 2009; **54**(1): 55-66
9. Meredith PA, Ostergren J. From hypertension to heart failure - are there better primary prevention strategies? J Renin-Angiotensin-Aldosterone System 2006; **7**(2): 64
10. Dempsie Y, Maclean MR. The influence of gender on the development of pulmonary arterial hypertension. J experimental physiol 2013; **98**(8): 1257-1261
11. Humbert M, Sitbon O, Chaouat A, Bertocchi, M., Habib, G., Gressin, V., Yaïci, A., Weitzenblum, E., Cordier, J, Chabot, F, Dromer C, Pison C, Reynaud-Gaubert M, Haloun A, Laurent M, Hachulla E, Cottin V, Degano B, Jaïs X, Montani D, Souza R, Simonneau G. Survival in patients with idiopathic, familial, and anorexigen-

associated pulmonary arterial hypertension in the modern management era. *J Circulation* 2010; **122**(2): 156-163

*Supplement*

12. Simonneau G, Gatzoulis MA, Adatia I, Celermajer D, Denton C, Ghofrani A, Gomez SMA, Krishna KR, Landzberg M, Machado RF, Olschewski H, Robbins IM, Souza R. Updated Clinical Classification Of Pulmonary Hypertension. *J Am Coll. Cardiol* 2013; **62**(25) (e-Supp):34

*Articles in journals*

13. Rabinovitch M. Molecular pathogenesis of pulmonary arterial hypertension. *J clinical investigation* 2012; **122**(12): 4306-4313
14. Runo JR, Loyd JE. Primary pulmonary hypertension. *J Lancet* 2003; **1**(9368): 1533-1544.

*Supplement*

15. Simonneau G, Gatzoulis MA, Adatia I, Celermajer D, Denton C, Ghofrani A, Gomez SMA, Krishna KR, Landzberg M, Machado RF, Olschewski H, Robbins IM, Souza R. Updated Clinical Classification Of Pulmonary Hypertension. *J Am Coll. Cardiol* 2013; **62**(25) (e-Supp):34

*Book*

16. Cooper G, Hausman R. *The cell: A Molecular Approach*. Washington, D.C.: ASM Press. 2009

*Articles in journals*

17. Murray F, Maclean MR, Pyne J. Increased expression of the cGMP-inhibited cAMP-specific (PDE3) and cGMP binding cGMP-specific (PDE5) phosphodiesterases in models of pulmonary hypertension. *Brit J Pharmacology* 2002; **137**(8):1187-1194
18. Gilbert JS, Ryan MJ, Lamarca BB, Sedeek M, Murphy SR, Granger JP. Pathophysiology of hypertension during preeclampsia: linking placental ischemia with endothelial dysfunction. *Amr J Physiol - Heart and Circulatory Physiology* 2008; **294**(2): 541-550
19. Palei AC, Spradley FT, Warrington JP, George EM, Granger JP. Pathophysiology of hypertension in pre-eclampsia: a lesson in integrative physiology. *ActaPhysiologica* 2013; **208**(3): 224-233

*Book*

20. Rang PH, Ritter MJ, Flower JR, Handerson G. *Rang and Dales Pharmacology*. London: Elsevier Inc. 2012

*Articles in journals*

21. Dmitriy NA, Huang PL. Endothelial nitric oxide synthase transgenic models of endothelial dysfunction. *Euro J Physiol* 2010; **460**: 965
22. DeWit C, Hoepfl B, Wolfle SE. Endothelial mediators and communication through vascular gap junctions. *BiolChem* 2006; **387**: 3–9
23. Figueroa XF, Isakson BE, Duling BR. Vascular gap junctions in hypertension. *J Hypertension* 2006; **48**: 804–811
24. Billaud, M, Dahan D, Marthan R, Savineau J, Guibert C. Role of the gap junctions in the contractile response to agonists in pulmonary artery from two rat models of pulmonary hypertension. *J Res research* 2011; **12**: 30-30
25. Johnstone, S, Isakson B, Locke, D. Biological and biophysical properties of vascular connexinchannels. *Int. Rev. Cell Mol. Biol.* 2009; **278**: 69–118
26. Mese G, Richard G, White TW. Gap Junctions: Basic Structure and Function. *J Invest Dermatol* 2007; **127**(11): 2516-2524
27. Gabriels JE, Paul DL. Connexin43 is highly localized to sites of disturbed flow in rat aortic endothelium but connexin37 and connexin40 are more uniformly distributed. *Circ Res* 1998; **83**: 636–643
28. Liao Y, Regan CP, Manabe I, Owens GK, Day KH, Damon DN, Duling BR. Smooth muscle-targeted knockout of connexin43 enhances neointimal formation in response to vascular injury. *Arterioscler Thromb Vasc Biol* 2007; **27**:1037–1042
29. Brisset AC, Isakson BE, Kwak BR. Connexins in vascular physiology and pathology. *Antioxid Redox Signal* 2009; **11**:267–282
30. Chadjichristos CE, Matter CM, Roth I, Sutter E, Pelli G, Luscher TF, Chanson M, Kwak BR. Reduced connexin43 expression limits neointima formation after balloon distension injury in hypercholesterolemic mice. *Circulation* 2006; **113**:2835–2843
31. Walker DL, Vacha SJ, Kirby ML, Lo CW. Connexin43 deficiency causes dysregulation of coronary vasculogenesis. *Dev Biol* 2005; **284**:479–498
32. Kirca M, Kleinbongard P, Soetkamp D, Heger J, Csonka C, Ferdinandy P, Schulz, R. Interaction between Connexin 43 and nitric oxide synthase in mice heart mitochondria. *Journal of Cellular and Molecular Medicine* 2015; **19**(4): 815-825
33. Eurogentec. *qPCR guide*. Available: <http://www.eurogentec.com/uploads/qpcr-guide.pdf> 2013. Last accessed 5th April, 2016
34. John SM, Igor VM. Non-coding RNA. *Human Mol. Genetics* 2006; **15**: 17-19

35. Primerdesign Ltd. *Beginner's Guide to Real-Time PCR*. Available: [http://www.primerdesign.co.uk/assets/files/beginners\\_guide\\_to\\_real\\_time\\_pcr.pdf](http://www.primerdesign.co.uk/assets/files/beginners_guide_to_real_time_pcr.pdf)  
2008. Last accessed 20th Jan 2016
36. Eisenberg E, Levanon EY. Human housekeeping genes, revisited. *Trends in genetics* 2013; **29**(10): 569
37. Barril P, Nates S. Introduction to Agarose and Polyacrylamide Gel Electrophoresis Matrices with Respect to Their Detection Sensitivities, *Gel Electrophoresis - Principles and Basics*; 2012 Available: <http://cdn.intechopen.com/pdfs-wm/35087.pdf>  
Last accessed 19th Feb 2016
38. Ruiz-Holst, CB, Bölck A, Ghanem CK Tiemann DS, Brokat EV, Regitz-Zagrosek EW, Bloch A, Robert HG, Schwinger FK, Brixiusab. eNOS phosphorylation and translocation are altered in male but not female mice by increased activation of the Gαq protein. *Can. J. Physiol. Pharmacol* 2010; **88** (2):121-129
39. Kwak BR, Pepper MS, Gros DB, Meda P. Inhibition of endothelial wound repair by dominant negative connexin inhibitors. *MolBiol Cell* 2001; **12**:831–845
40. Bobbie MW, Roy S, Trudeau K, Munger SJ, Simon AM.Reduced connexin 43 expression and its effect on the development of vascular lesions in retinas of diabetic mice. *Investigative ophthalmology & visual science* 2010; **51**(7):3758

#### *Supplement*

41. Dlugosová K, Mitasíková M, Bernátová I, Weismann P, Okruhlicová L. Reduced Connexin-43 Expression in the Aorta of Prehypertensive Rats. *Physiological Research* 2008; **57**(e-Supp): 23-29

#### *Articles in journals*

42. Liao Y, Day KH, Damon DN, Duling BR. Endothelial cell-specific knockout of connexin 43 causes hypotension and bradycardia in mice. *Proc Natl AcadSci USA* 2001; **98**: 9989–9994
43. Haefliger JA, Meda P. Chronic hypertension alters the expression of Cx43 in cardiovascular muscle cells. *Braz J Med Biol* 2000; **33**: 431-438
44. Parthasarathi K, Ichimura H, Monma E, Lindert J, Quadri S, Issekutz A, Bhattacharya J. Connexin 43 mediates spread of Ca<sup>2+</sup>-dependent proinflammatory responses in lung capillaries. *J Clin Invest* 2006; **116**: 2193–2200
45. Yeh HI, Lee PY, Su CH, Tian TY, Ko YS, Tsai CH. Reduced expression of endothelial connexins 43 and 37 in hypertensive rats is rectified after 7-day carvedilol treatment. *Am J Hypertens* 2006; **19**:129 -135

46. Kruger O, Beny JL, Chabaud F, Traub O, Theis M, Brix K, Kirchhoffs, Willecke K. Altered dye diffusion and upregulation of connexin37 in mouse aortic endothelium deficient in connexin 40. *J Vasc Res* 2002; **39**:160–172
47. Looft-Wilson, RC, Billaud M, Johnstone SR, Straub AC, Isakson BE. Interaction between nitric oxide signalling and gap junctions: Effects on vascular function. *Biochimica et Biophysica Acta (BBA) – Biomembranes* 2012; **1818**(8):1895-1902

## ABBREVIATIONS

|         |                                                   |
|---------|---------------------------------------------------|
| Cx 43 – | Connexin 43                                       |
| eNOS –  | Endothelial nitric oxide synthase                 |
| NO –    | Nitric oxide                                      |
| PAH –   | Pulmonary Arterial Hypertension                   |
| HET –   | Heterozygous                                      |
| W/T -   | Wild type                                         |
| RNA –   | Ribonucleic acid                                  |
| cDNA -  | Complementary DNA                                 |
| PCR -   | Polymerase chain reaction                         |
| PAP –   | Pulmonary arterial pressure                       |
| SMC -   | Smooth muscle cell                                |
| PVR –   | Pulmonary vascular resistance                     |
| RV -    | Right ventricle                                   |
| WHO -   | World Health Organization                         |
| IPAH –  | Idiopathic PAH                                    |
| HPAH –  | Heritable PAH                                     |
| APAH –  | Associated PAH                                    |
| PPHN –  | Persistent pulmonary hypertension of the new born |
| cGMP -  | Cyclic guanosine monophosphate                    |

|                    |                                                  |
|--------------------|--------------------------------------------------|
| PKG -              | Protein kinase G                                 |
| PDE-5 –            | Phosphodiesterase -5                             |
| Ca <sup>2+</sup> - | Calcium                                          |
| NIH -              | National Institutes of Health                    |
| DNase –            | Deoxyribonuclease                                |
| rDNase –           | Recombinant Deoxyribonuclease                    |
| TCEP –             | Tris (2-carboxyethyl) phosphine                  |
| rpm -              | Revolutions per minute                           |
| MDB-               | Membrane Desalting Buffer                        |
| RNAse -            | Ribonuclease                                     |
| RT –               | Reverse transcriptase                            |
| Oligo-dTs -        | Deoxy-thymine nucleotides                        |
| Bp –               | Base pairs                                       |
| RT-PCR -           | Reverse transcription polymerase chain reaction  |
| TBE –              | Tris/Borate/EDTA                                 |
| EDTA -             | Ethylene-Diamine-Tetraacetic Acid                |
| qRT-PCR -          | Quantitative Real-Time polymerase chain reaction |
| UNG -              | Uracil N-glycosylase (UNG)                       |
| UBC –              | Ubiquitin C                                      |
| Ct -               | Quantitation cycle                               |



|                     |                        |
|---------------------|------------------------|
| $\Delta\Delta$ Ct - | Delta delta Ct         |
| GOI –               | Gene of interest       |
| HK -                | House keeping          |
| ANOVA -             | Analysis of variance   |
| SEM –               | Standard error of mean |
| EC –                | Endothelial cell       |
